# Rational tuning of a membrane-perforating antimicrobial peptide to selectively target membranes of different lipid composition

Charles H. Chen<sup>1,2,3,6,\*</sup>, Charles G. Starr<sup>4</sup>, Shantanu Guha<sup>4</sup>, William C. Wimley<sup>4</sup>, Martin B. Ulmschneider<sup>1,2,3,\*</sup>, Jakob P. Ulmschneider<sup>5,\*</sup>

<sup>1</sup>Department of Chemistry, King's College London, London, UK

<sup>2</sup>Department of Engineering and Materials Science, Johns Hopkins University, Baltimore, MD, USA

<sup>3</sup>Institute for NanoBioTechnology, Johns Hopkins University, Baltimore, MD, USA

<sup>4</sup>Department of Biochemistry and Molecular Biology, Tulane University School of Medicine, New Orleans, LA, USA

<sup>5</sup>Institute of Natural Sciences, Shanghai Jiao-Tong University, Shanghai, China

<sup>6</sup>Present address: MIT Synthetic Biology Center and Research Laboratory of Electronics, Massachusetts Institute of Technology, Cambridge, MA, USA

\*Correspondence and requests for materials should be addressed to C.H.C. (email: [chenchar@mit.edu](mailto:chenchar@mit.edu)), M.B.U. (email: [martin.ulmschneider@kcl.ac.uk](mailto:martin.ulmschneider@kcl.ac.uk)), or to J.P.U. (email: [jakob@sjtu.edu.cn](mailto:jakob@sjtu.edu.cn))

## Abstract:

The use of designed antimicrobial peptides as drugs has been impeded by the absence of simple sequence-structure-function relationships and design rules. The likely cause is that many of these peptides permeabilize membranes via highly disordered, heterogeneous mechanisms, forming aggregates without well-defined tertiary or secondary structure. We demonstrate that the combination of high-throughput library screening with atomistic computer simulations can successfully address this challenge by tuning a previously developed general pore forming peptide into a selective pore former for different lipid types. A library of 2,916 peptides was designed based on the LDKA template. The library peptides were synthesized and screened using a high-throughput orthogonal vesicle leakage assay. Dyes of different sizes were entrapped inside vesicles with varying lipid composition to simultaneously screen for both pore size and affinity for negatively charged and neutral lipid membranes. From this screen, nine different LDKA variants that have unique activity were selected, sequenced, synthesized, and characterized. Despite the minor sequence changes, each of these peptides has unique functional properties, forming either small or large pores and being selective for either neutral or anionic lipid bilayers. Long-scale, unbiased atomistic molecular dynamics (MD) simulations directly reveal that rather than rigid, well-defined pores, these peptides can form a large repertoire of functional dynamic and heterogeneous aggregates, strongly affected by single mutations. Predicting the propensity to aggregate and assemble in a given environment from sequence alone holds the key to functional prediction of membrane permeabilization.

**Keywords:** Antimicrobial Peptides, Leucine-rich Peptide, LDKA, Protein Folding, Pore-formation, Bacterial Selectivity, Drug-resistant Bacteria, and Biofilm.

## 43 Introduction

44 Recent years have seen a renewed interest in antimicrobial peptides (AMPs) as potential  
45 successors to small-molecule antibiotics<sup>1-8</sup>. The advantages of AMPs are clear: peptides are  
46 getting cheaper to synthesize on an industrial scale<sup>9-13</sup>, offer a near infinite chemical repertoire  
47 to target different species and cellular processes<sup>14</sup>, and can be rapidly screened using high-  
48 throughput methodologies<sup>15-18</sup>. AMPs are also proven, being a ubiquitous part of the innate  
49 immune defence of most branches of life. Although some AMPs are toxic to mammalian cells,  
50 many of these amphiphilic peptides selectively target and kill bacteria at low micro-molar  
51 concentrations without harming host cells<sup>19-22</sup>. Sequence analysis of >3,000 of known AMPs  
52 reveal a wide variation in amino acid composition, peptide length, and secondary structure;  
53 however, no clear functional motifs associated with antimicrobial activity have been identified to  
54 date, impeding rational optimisation and *de novo* design<sup>2,23-25</sup>. Despite this, there has been  
55 considerable progress in rational design and re-engineering of AMPs<sup>24,26-35</sup>. These studies have  
56 shown that a small number of amino acid mutations in a given sequence can significantly change  
57 functional properties such as pore stability<sup>36</sup>, antimicrobial activity<sup>26,37-39</sup>, pore size<sup>30,36</sup>,  
58 membrane selectivity<sup>37</sup>, and pH-dependent activity<sup>27,40-42</sup>. Peptide length also acts as an  
59 important factor. Ulrich *et al.* reported several rationally designed helical peptides with repeated  
60 KIAGKIA motifs with peptide length between 14 and 28 amino acids, and showed that the  
61 peptide length can affect its ability to penetrate and disrupt cell membranes<sup>43,44</sup>.

62 The ultimate goal is to develop AMPs that can selectively target specific membrane types  
63 in order to target pathogens with high potency, without harming host cells. A rational joint *in-*  
64 *silico*/experimental process has great potential for such *de novo* AMP design<sup>45</sup>. In the absence of  
65 reliable predictive rules for engineering the activity of membrane permeabilizing peptides, a  
66 recent breakthrough has been the use of synthetic molecular evolution, which is accomplished  
67 with orthogonal screening of a designed, iterative, combinatorial peptide library.<sup>26,30,36,41,46</sup>  
68 Another strategy has been a simulation-guided design approach<sup>24</sup>, which we have applied to  
69 develop a potent pore-forming AMP starting from a membrane spanning poly-leucine helix<sup>47</sup>. This  
70 new synthetic 14-residue AMP (sequence = GLLDLLKLLKAAG), called LDKA, consists of only five  
71 amino acids (glycine, aspartic acid, lysine, leucine, and alanine) and shares similar sequences to  
72 many short antimicrobial peptides<sup>24,48</sup>. LDKA exhibits low micromolar antimicrobial activity and  
73 forms pores in both anionic POPG (1-palmitoyl-2-oleoyl-sn-glycero-3-phosphoglycerol) and  
74 neutral POPC (1-palmitoyl-2-oleoyl-sn-glycero-3-phosphocholine) lipid vesicles at low peptide-to-  
75 lipid ratios (P:L = 1:1000)<sup>24</sup>, which is comparable to the potent pore-forming peptide, melittin,  
76 and its gain-of-function analogue MelP5<sup>36,37</sup>.

77 Here, we explore whether we can rationally develop a general pore forming peptide into  
78 a selective pore former via a joint molecular dynamics (MD) simulation and an experimental  
79 library-screening approach. We start by tuning the hydrophobic moment and charge distribution  
80 to introduce preferential binding and pore formation in charged and neutral lipid bilayers and  
81 that this preferential binding correlates to activity against human versus bacterial cells. We  
82 demonstrate that relatively conservative sequence changes of the LDKA template can indeed  
83 modulate the induced preferential pore-forming potency in anionic versus neutral lipid bilayers  
84 as well as the size of the pores formed. We further demonstrate that these properties correlate  
85 well with antimicrobial activity for specific bacteria and selectivity for bacterial over human red  
86 blood cells.

87 Our results suggest that *in-vitro* activity, lipid selectivity, and aggregation propensities of  
88 AMPs depend highly on even the most conservative sequence changes. While the broad  
89 underlying properties correlate with simple descriptors that can be directly derived from the  
90 peptide sequence (e.g. hydrophobic moment, overall charge, and amphiphilicity), these  
91 quantities do not allow us to directly determine which sequence will be selective, or porate  
92 membranes at all. The peptides form a large repertoire of functional dynamic and heterogeneous  
93 structures in the membrane, and each sequence change can dramatically affect the  
94 oligomerization propensity, structure of the aggregates, ability to porate, and selectivity for  
95 different membrane compositions so desired for pharmaceutical application. This suggests that  
96 ultimately only structure (rather than sequence) based approaches, such as direct pore  
97 aggregation and equilibrium simulations, will enable predictive, rather than descriptive *de novo*  
98 AMP design.

99

## 100 Results

101 **Rational peptide design.** LDKA is a small pore-former in neutral POPC and anionic POPG vesicles  
102 and has low micromolar antimicrobial activity against bacteria. The goal of this library is to  
103 explore whether simple rearrangements of the LDKA sequence using four amino acids (Leu, Asp,  
104 Lys, and Ala), will allow modulation of pore-forming potential, pore-size, and targeting of specific  
105 membrane compositions. To achieve this, we have designed a combinatorial peptide library  
106 containing 2,916 LDKA analogues (**Figure 1a-b**). The LDKA template sequence was mutated in  
107 order to: (i.) adjust peptide hydrophobicity, (ii.) promote more salt bridge formation between the  
108 peptides, (iii.) introduce a central proline kink to the structure, and (iv.) substitute more  
109 positively charged residues on the C-terminus, which is one of the common motifs in the  
110 *Antimicrobial Peptide Database (APD)*; <http://aps.unmc.edu/AP>)<sup>49</sup>.

111 Peptide hydrophobicity is modulated by interchanging leucine and alanine residues as  
112 well as substituting more positive (lysine) and negative charges (aspartic acid) in the sequence.  
113 The goal of these mutations is to fine-tune the peptide solubility and membrane-partitioning. To  
114 further allow for more structural plasticity of the peptide, we introduced a proline near the  
115 center of the peptide sequence, which is common in naturally occurring AMPs<sup>50,51</sup>. More charged  
116 residues (aspartic acid and lysine) were introduced to both facilitate inter-peptide salt-bridge  
117 formation and strengthen the peptide-peptide interface<sup>52</sup>, as well as to allow for a more polar  
118 central pore enabling larger multimeric channel structures<sup>24,53</sup>. Additional positive charges were  
119 introduced at the C-terminus to enhance peptide binding to anionic lipids, which is a common  
120 motif in many antimicrobial peptides from natural sources, such as Hylaseptin-P1<sup>22,54</sup>, Hylain 2<sup>55</sup>,  
121 melittin<sup>56,57</sup>, and maculatin<sup>50,51</sup>.

122

123 **Membrane specific poration and pore size.** The potency and membrane selectivity of the 2,916  
124 LDKA library peptides for zwitterionic (POPC) and anionic (POPG) large unilamellar vesicles (LUVs)  
125 was evaluated using a high-throughput liposome leakage screen. This approach allows us to  
126 detect and quantify the release of small fluorescent dye ANTS (8-aminonaphthalene-1,3,6-  
127 trisulfonic acid disodium salt; MW = 427 Da) and its fluorescent quencher DPX (p-xylene-bis-  
128 pyridinium bromide; MW = 422 Da) encapsulated in LUVs after addition of the library peptides.  
129 Neutral POPC LUVs serve as a simple model for mammalian membranes, while charged POPG  
130 LUVs serve as a very simplistic model for bacterial membranes enriched in anionic lipids.

131 **Figure 1c** demonstrates the fluorescent dye leakage fraction from both neutral and  
132 charged LUVs after addition of the library peptides. In this study, 11.2% of the LDKA analogues  
133 have PPG-favourable selectivity and induce >50% encapsulated dye leakage from charged PPG  
134 LUVs at low peptide concentration (P:L = 1:1000), while 0.4% cause leakage from neutral POPC  
135 LUVs only, and 6.6% disrupt both POPC and PPG LUVs. LDKA analogues that induce >90% dye  
136 leakage from POPC and PPG LUVs were screened for their ability to induce leakage of a larger 3-  
137 kDa TAMRA-biotin-dextran (TBD) dye<sup>36</sup>. Several LDKA-like peptides form larger pores in PPG  
138 vesicles, while the pores induced in POPC vesicles are generally smaller (**Figure 1d-e**).

139 Eight LDKA peptides with different lipid selectivity and pore sizes were selected from the  
140 high-throughput screen and sequenced using Edman degradation<sup>58</sup>. Table 1 shows that these  
141 peptides have 1 to 4 mutations compared to the LDKA template sequence. The most common  
142 mutation is leucine to alanine, occurring 13 times and in a total of 7 of the 8 peptides. Alanine to  
143 leucine occurred 6 times in 5 peptides, leucine to aspartic acid occurred 3 times in 3 peptides,  
144 and leucine to proline occurred once.

145 The analysis of selected peptide sequences showed positive-charged lysine is not a  
146 favourable substitution in the non-polar face of the LDKA template helix and the C-terminal motif  
147 (positions 6, 8, 10, 12, and 13). Instead, hydrophobic leucine and alanine are more preferable.  
148 This is in agreement with the evolutionary derivatives of 26-residue melittin, in that the  
149 positively-charged amino acids (lysine and arginine) are less likely to be favored in the non-polar  
150 face<sup>26,37</sup>.

151 Other than fixed lysine at positions 7 and 11, no additional lysine residues were observed  
152 in the analogues. Additional aspartic acids were observed at position 3 and 5, which is right next  
153 to the fixed aspartic acid at position 4 that can further promote salt bridge formation in peptide-  
154 peptide interactions. The net charges of these analogues are between +1 and +2, and they are  
155 consistent with the majority (net charge +1) of AMPs in the *APD*<sup>23,49</sup>. This shows that cationic  
156 residues can promote peptide binding to anionic bacterial membranes; however, more cationic  
157 charges may result in lower hydrophobicity and higher energy barriers to cross the hydrophobic  
158 core of membranes. Therefore, a longer peptide length is needed to strengthen the  
159 hydrophobicity when the sequence contains more charges. A natural membrane-active peptide,  
160 melittin (sequence: GIGAVLKVLTTGLPALISWIKRKRQQ-Amide), is a good example. Although it has  
161 four positive charges (-KRKR-) in its C-terminus, longer peptide length (26 amino acids) and the  
162 hydrophobic N-terminus (GIGAVLKVL-) make it hydrophobic enough to span cell membranes.

163 Table 1 reveals that leucine to alanine mutations are generally sufficient to prevent  
164 poration in neutral POPC membranes, while the peptides still porate charged PPG membranes,  
165 which is similar to the L16G mutation of melittin<sup>37</sup>. More specifically, the LDKA analogues that  
166 only induce ANTS/DPX leakage from anionic PPG LUVs have 4-5 leucines, while the analogues  
167 that can porate both POPC and PPG LUVs have 6-7 leucines in their sequences. The net charge  
168 of all LDKA wildtype and analogues are between +1 and +2, and we did not observe any anionic  
169 peptide, neutral peptide, or peptide that has net charge greater than +2. This suggests that the  
170 membrane-selectivity is driven by hydrophobic moment to POPC but including electrostatics on  
171 PPG.

172  
173 **Binding to mixed membranes.** To investigate the root cause of the different leakage preferences  
174 of LDKA analogues for POPC and PPG membranes, we studied the binding and secondary

175 structural properties of LDKA analogues using tryptophan fluorescence and circular dichroism  
176 (CD) spectroscopy, respectively. Peptide solutions (50  $\mu$ M peptide concentration) were titrated  
177 with POPC and POPG LUVs (between 0-5 mM) and the corresponding changes of tryptophan  
178 fluorescent spectra were collected, yielding binding free energies and helicities of the peptides,  
179 albeit without any structural information on the underlying poration process (**Figure S1**,  
180 supplement).

181 Further studies were performed to answer why some peptides (i.e. 7D12, 7G6, 28H6,  
182 11D12, and 24F1) show selectivity for either membrane type. First, we characterised peptide  
183 secondary structural changes and binding to LUVs containing binary mixtures of POPC and POPG  
184 lipids. **Figure 2** (7D12, 7G6, and 28H6) and **Figure S5** (11D12 and 24F1) show changes in the  
185 tryptophan fluorescence and CD spectra for these peptides upon addition of LUVs for whom the  
186 ratio of POPG was elevated from 0 to 100% with 20% increments (0, 20, 40, 60, 80, and 100%  
187 POPG). These analogues are sensitive to the anionic POPG lipid and have significant structural  
188 change with small PG fraction (20% POPG), except 7D12 which is less sensitive to anionic lipid.  
189 These membrane selective peptides only bind to POPG and show little or no binding to POPC,  
190 which is consistent to our liposome leakage assay.

191

### 192 **Simulations of two similar sequences.**

193 The information gained from the experimental screen is limited in that there is an absence of a  
194 nuanced correlation between simple peptide descriptors and selectivity and leakage propensity.  
195 Since a multitude of AMP structures can cause membrane permeabilization,<sup>14</sup> it is critical to  
196 identify which overall mechanism applies for the chosen library template. Without knowledge of  
197 pore structures in the membrane, it is difficult to explain the role of individual sequence changes  
198 on both selectivity and poration ability, rendering the design process blind. Here, computer  
199 simulations offer to fill in the missing information. We have demonstrated before for numerous  
200 peptide/membrane systems that long-scale equilibrium MD simulations are now able to directly  
201 generate aggregate structures in different membrane types from peptide sequence alone<sup>45, 53</sup>.  
202 The computational effort is – for now – enormous, so only a small subset of the LDKA library was  
203 chosen for structural investigation, focusing on 2 peptides that are almost similar but have very  
204 different membrane selectivity: 25B2 (sequence: GLDDLAKLLLKLAGW-Amide) and 7D12  
205 (sequence: GLLDDAKLLAKLAGW-Amide). Despite very similar sequences, 25B2 (toxic peptide)  
206 causes fluorescent dye leakage from both POPC and POPG LUVs, and 7D12 (membrane-selective  
207 peptide) only porates POPG LUVs without disturbing POPC membranes. We sought to observe  
208 how these library peptides lyse their target membranes, and how almost identical sequences can  
209 have vastly different binding properties.

210 Both peptides have a net charge +1 and have the same C-terminal motif (-KLAGW-Amide).  
211 The only differences are (i.) aspartic acid shifts from position 3 in 25B2 to position 5 in 7D12, and  
212 (ii.) hydrophobic position 10 where 25B2 is leucine and 7D12 is alanine. A quick analysis shows  
213 these simple modifications result in a hydrophobic dipole moment of 4.8 in 25B2 and 1.9 in 7D12.  
214 Mirroring the biophysical experiments, we performed peptide-assembly simulations of 7D12 and  
215 25B2 in both POPC and POPG bilayers. (**Figure 3 and Table S3**). Simulations and experiments  
216 show that 25B2 results in higher helical content than 7D12 (**Table S2 and Table S3**). Similar to our  
217 prior simulations of LDKA, the peptides spontaneously insert and form a large number of  
218 heterogeneous oligomeric pore-structures. These can range from 3-9 peptides, with a core of

219 mainly 4-5 tilted TM inserted peptides, supported by several surface-bound peptides that are  
220 more loosely attached. Since the sequences are short, the main arrangements are strongly tilted  
221 and double-stacked, rather than a membrane-spanning barrel-stave layout. Peptides align both  
222 parallel and anti-parallel at various levels of insertion. The large number of charged sidechains,  
223 both cationic and anionic, enable small water-filled bilayer channels with many cross-peptide  
224 salt-bridges, pulling in both lipid headgroups and ions. Peptides usually leave and join these small  
225 aggregates, resulting in no overall stable structures but rather in a wide variety of different pore  
226 assemblies. There is substantial water and ion flux across these, with higher oligomers yielding  
227 larger flux. Both cations and anions can translocate across the pores, with a preference for  
228 cations in the POPG simulations, presumably due to the more anionic environment of the pore  
229 aggregates, where PG headgroups are pulled into the membrane. The heterogenous nature of  
230 the pore aggregates indicates a highly dynamic equilibrium which is strongly influenced by  
231 individual sequence changes. 7D12 is shown to be selective: It does not insert and form  
232 aggregates in POPC, but remains on the surface, indicating that pore aggregates are not stable in  
233 this membrane, and the surface state is preferred.

234  
235 **Isothermal titration calorimetry.** To directly compare the above simulations, we applied  
236 isothermal titration calorimetry (ITC) to further characterize their thermodynamic parameters:  
237 enthalpy ( $\Delta H$ ) and stoichiometry ( $N$ ). Titration of POPC vesicle into membrane-selective peptide  
238 7D12 (100  $\mu\text{M}$  peptide concentration) results in  $\Delta H = 0.1$  kcal/mol (**Figure 3c-d**), which is  
239 consistent with the tryptophan fluorescent binding assay that it does not bind strongly to POPC  
240 vesicle (**Figure S1**). Titrating POPG vesicle into 100  $\mu\text{M}$  7D12 has significant heat release ( $\Delta H = -$   
241 3.4 kcal/mol) with the stoichiometry of 11 lipids per peptide ( $N = 11$ ). On the other hand, the  
242 toxic peptide 25B2 with titrated POPC and POPG vesicles shows  $\Delta H = -(4.7-4.9)$  kcal/mol, and  
243 they both have the same stoichiometry of  $N = 5$  lipids per peptide.

244 The results of MD simulations and ITC are consistent. 7D12 in POPG, and 25B2 in both  
245 membrane types assembled channel-like architectures in MD simulations and showed significant  
246 heat release in ITC. In contrast, 7D12 in POPC bilayers neither formed any structure, nor induced  
247 any heat release/absorption. Thus, there is a remarkable agreement between experiments and  
248 simulations. The lower hydrophobic moment of 7D12 appears to explain the less thermostable  
249 helical structures than other peptides (**Figure S2**), and the unfolded structures are more  
250 disordered than the helical structure of 25B2 as compared to what we observed in ITC (**Figure 3c-**  
251 **d**). Therefore, it suggests hydrophobic moment is a determinant to promote membrane  
252 selectivity.

253  
254 **Hemolysis and antibacterial activity.** To test toxicity of the LDKA analogues against human cells,  
255 we performed a hemolysis assay (**Figure 4a**). LDKA wildtype is hemolytic at moderate micromolar  
256 concentrations with a hemolytic concentration lysing 50% of red blood cells ( $\text{HC}_{50}$ ) of 55.1  $\mu\text{M}$   
257 (Table 2). The peptide-induced POPC LUV leakage is correlated with the hemolytic activity (**Figure**  
258 **4b-c**). The peptides that induce leakage from POPC LUV at low peptide concentration (P:L =  
259 1:1000) are hemolytic ( $\text{HC}_{50} = 1-57$   $\mu\text{M}$ ). More specifically, 7F3 ( $\text{HC}_{50} = 1.1$   $\mu\text{M}$ ) and 28H6 ( $\text{HC}_{50} =$   
260 1.2  $\mu\text{M}$ ) are as powerful as natural toxin melittin and its gain-of-function derivative MelP5 ( $\text{HC}_{50} =$   
261 1-3  $\mu\text{M}$ )<sup>37</sup>. All POPG-favourable peptides have no effect to human red blood cell, even at 75  $\mu\text{M}$   
262 peptide concentration.

263 The real test is how selectively the selected peptides target and kill various bacteria. The  
264 antibacterial activity of LDKA analogues against *E. coli*, *S. aureus*, and *P. aeruginosa* was tested *in*  
265 *vitro* in nutritionally rich medium. LDKA wildtype inhibits growth of all three bacteria at  
266 micromolar peptide concentrations of a similar range to potent AMPs from natural sources. From  
267 our screen, most of the POPG-favourable peptides (7G6, 11D12, and 24F1) have antibacterial  
268 activity and specificity against *E. coli* with 19-44  $\mu$ M minimum inhibitory concentration (MIC) but  
269 are not active against other bacterial species: *S. aureus* and *P. aeruginosa* (Table 2). The toxic  
270 peptides 7F3, 25B2, and 4H9 are effective inhibitors against *E. coli* and *S. aureus*, but not *P.*  
271 *aeruginosa*. The results show that these peptides have specificity toward different bacterial  
272 species.

273  
274 **Activity against antibiotic-resistant strains.** Bacteria can mutate and develop resistance against  
275 conventional antibiotics<sup>2,59-61</sup>, which mostly target specific proteins, ribosomes, or DNA.  
276 Antimicrobial peptides exert their effects through a more generalized mechanism: membrane  
277 poration. We selected four conventional antibiotics that have different mechanisms to kill  
278 bacteria: ceftazidime, ciprofloxacin, streptomycin, and gentamicin. Ceftazidime interferes with  
279 bacterial cell wall formation<sup>62,63</sup>. Ciprofloxacin inhibits DNA gyrase, type II topoisomerase, and  
280 topoisomerase IV to separate bacterial DNA and DNA replication, thus inhibiting cell division<sup>64</sup>.  
281 Streptomycin and gentamicin inhibit protein synthesis at the ribosome<sup>65,66</sup>. Drug-resistant *E. coli*  
282 strain ATCC 25922 cultures were grown in the presence of each antibiotic at elevated  
283 concentration and the surviving strains was selected to grow for 10 generations, resulting in a 4  
284 to 16-fold resistance to these antibiotics compared to their 1<sup>st</sup> generation strain (**Figure 5a**).

285 LDKA analogues were tested against these four drug-resistant *E. coli* cultures. Membrane-  
286 selective analogues (7G6, 11D12, and 24F1) remain effective and consistently inhibit the growth  
287 of ceftazidime-resistant, streptomycin-resistant, and gentamicin-resistant *E. coli* strains with 27-  
288 44  $\mu$ M peptide concentrations (**Figure 5b**). Toxic peptides (4H9, 7F3, and 25B2) are effective  
289 against ceftazidime-resistant and gentamicin-resistant *E. coli* at low peptide concentrations (6-14  
290  $\mu$ M). Surprisingly, none of the peptides are effective against the ciprofloxacin-resistant *E. coli*  
291 strain.

292  
293 **Activity against biofilms.** In clinical settings, bacteria are mostly found in biofilms that are the  
294 key drivers of infections<sup>67,68</sup>. We therefore challenged our LDKA analogues against bacterial  
295 biofilms, which are generally much more resistant than planktonic equivalents<sup>69</sup>. The results  
296 showed that the selected LDKA analogues (4H9, 7F3, 25B2, 7G6, 11D12, and 24F1) can eliminate  
297 ~50% of the *E. coli* biofilm in the presence of 67-150  $\mu$ M peptide. Only 7F3 is capable of reducing  
298 *S. aureus* biofilms by ~50% with 100  $\mu$ M peptide concentration, and none of the analogues work  
299 against *P. aeruginosa* biofilms (**Figure 5c-e**).

## 300 301 **Discussion and Conclusions**

302 In this study, we used the leucine-rich membrane-active peptide LDKA as a sequence template in  
303 order to test whether the combination of database-guided combinatorial peptide library  
304 screening, and direct MD simulation of membrane aggregation, can tune the template to  
305 significantly change its secondary structure, potency, and membrane specificity. Similar rational  
306 combinatorial design has been used before to develop and tune the activity of other

307 AMPs<sup>26,37,50,70</sup>. The LDKA library peptides were designed using only four different amino acids  
308 (Asp, Lys, Leu, and Ala) in a template sequence of GxxDxxKxxxKxxGW-Amide, where 'x'  
309 represents one of the four amino acids. Our LDKA analogues reveal that a small number of  
310 conservative substitutions (Leu to Ala) in the LDKA sequence can dramatically change the  
311 selectivity toward different membrane types (anionic and neutral LUVs), resulting in specificity to  
312 different bacteria species and human red blood cells. This is consistent with Krauson *et al.*, who  
313 showed a single-residue change of a leucine at position 16 to glycine (L16G) can redirect the  
314 general toxicity of melittin towards bacteria only, leaving red blood cells unharmed<sup>37</sup>. A similar  
315 study introduced charged amino acids in the C-terminal motif of HYL-20 peptide, fine-tuning the  
316 selectivity against several bacteria strains with negligible hemolytic activity<sup>70</sup>. The fact that we  
317 did not observe this feature in our LDKA peptide library suggests, again, that simple generic  
318 structure-function rules are not applicable to membrane active peptides.

319 The dependence of the drastic changes in selectivity and leakage propensity upon small  
320 sequence changes demonstrates the limitation of overall macroscopic peptide descriptors such  
321 as hydrophobic moment and polar angle as design criteria. For example, the hydrophobic  
322 moment is somewhat correlated to hemolytic activity (**Figure S4d**), and the LDKA peptide library  
323 suggests a hydrophobic moment of 3.37 as a cut-off for toxicity toward human red blood cells;  
324 however, this does not apply to 26-residue peptide melittin (hydrophobic moment = 3.94) and its  
325 membrane-selective analogue (hydrophobic moment = 3.44-3.46). Hydrophobic moment  
326 estimates could be limited as they are based on a single, perfectly helical peptides, and do not  
327 consider peptide-peptide aggregates and assemblies, as observed in our MD simulations.<sup>71-76</sup>  
328 Experimentally, fluorescent dye leakage from POPC vesicle is also a reliable model to predict the  
329 hemolytic activity with a linear correlation (R-squared value = 0.87; **Figure 4b**). It is similar to  
330 structure-function relationship that shows R-squared value 0.78 between helicity in POPC LUV  
331 and hemolysis (**Figure 4c**).

332 The absence of strong correlations between macroscopic peptide descriptors and  
333 selectivity and leakage propensity means detailed structural models are needed to show what is  
334 going on. Advances in computer performance have enabled long-scale (multi- $\mu$ s), fully atomistic  
335 MD simulations to provide that picture.<sup>53,77-87</sup> We have demonstrated before that MD  
336 simulations are now able to directly predict aggregate structures in membranes.<sup>45,53,87</sup> The  
337 simulations here show the atomic details of how these short membrane-spanning peptides  
338 selectively fold, aggregate, and form water pores in specific lipid bilayers (**Figure 3**). Key to these  
339 simulations is that they are not stuck in initial conditions. The pore aggregates are predicted  
340 without any prior information and fluctuate sufficiently to reveal the major structural assemblies  
341 that these peptides are expected to populate at either equilibrium, or during a membrane  
342 permeabilization event. Structures are highly heterogenous. The selectivity found in the  
343 experiments is reproduced in the simulations: 7D12 only folds and assembles in anionic POPG  
344 bilayers. There are no TM pores for 7D12 in POPC, with the peptides staying on the membrane  
345 surface and no noticeable water leakage. This is consistent to the experimental findings, and it  
346 demonstrates the extreme effect even tiny sequence changes can have on the pore forming  
347 equilibrium. Anionic sidechains are known for their steep insertion penalties,<sup>88</sup> so the reason for  
348 the lack of TM insertion likely is the shift of the 2 Asp residues one position towards the center of  
349 the peptide. The propensity of a peptide sequence to aggregate and assemble in a given  
350 environment depends in a highly complex and non-linear way on the its sequence. Therefore,



351 purely sequence-based design approaches are likely not suited for peptides that can form such a  
352 large repertoire of functional structures.

353 How do the designed library peptides perform in killing pathogens? Several minor  
354 mutations of LDKA can fine-tune the potency and specificity to kill *E. coli*, but not harming human  
355 red blood cells, *S. aureus*, and *P. aeruginosa*. Most of the LDKA peptides are able to inhibit the  
356 growth of *E. coli* with 19-57  $\mu\text{M}$  peptide concentrations, except 28H6 and 7D12 that fail to treat *E.*  
357 *coli*. 7D12 has the lowest hydrophobic moment 1.92 that may not be strong enough to fold and  
358 assemble in the bacterial membrane. Furthermore, the surface protease OmpT on the outer  
359 membrane of the *E. coli* may confer resistance to these leucine-rich peptides by cleaving their  
360 peptide bonds and degrading the peptides<sup>89</sup>. Our study suggests that small fluorescent dye  
361 leakage assay with POPC LUVs and POPG LUVs are ideal models to quickly screen the AMPs for  
362 their hemolytic activity and antibacterial activity. However, formation of different pore size does  
363 not correlate to the *in-vitro* activity in our study.

364 Antibiotic-resistance is another serious threat. Half of the LDKA analogues that are able to  
365 inhibit the *S. aureus*, but many of them fail to eliminate the super bug, methicillin-resistant  
366 *Staphylococcus aureus* (MRSA) (Table 2). Although our LDKA analogues are less or not effective  
367 against *S. aureus* and *P. aeruginosa*, many of them are useful to eradicate *E. coli* with negligible  
368 effect to human red blood cell. Remarkably, these LDKA peptides are active against drug-  
369 resistant *E. coli* (**Figure 5a-b**) and biofilm (**Figure 5c-e**) with micromolar peptide concentrations.

370 Our study demonstrates a simple methodology of the rational design of membrane-  
371 selective peptides, revealing the potential of using MD simulations to fine-tune the membrane  
372 selectivity for peptide design and protein engineering for different cell types. This demonstrates  
373 the feasibility of computer-guided antibiotics design<sup>24,90-92</sup>, developing potent antimicrobial  
374 peptides that have effective membrane selectivity to distinguish between human red blood cells  
375 and bacterial membranes, and even between different bacterial species. The key advantage of *in-*  
376 *silico* techniques is the vastly larger combinatorial space that can be explored in comparison to  
377 experimental library screening. In this study, the large-scale all-atomistic simulation effort was  
378 limited to only a few sequences and target membranes due to the heavy resources required.  
379 However, the strong correlation to the experimental results demonstrates the maturity of these  
380 techniques. With rising computing power in the near future, the library screening effort will be  
381 shifted towards the computational side. This combined experimental/computational approach  
382 opens the path to apply these LDKA analogues, and numerous other designed peptides to various  
383 different biomedical applications, e.g. antibiotics, biosensors, and drug delivery.

384

## 385 **Methods**

386 **Combinatorial peptide library synthesis.** The synthesis of combinatorial peptide library was  
387 modified from the method described by Krauson, *et al*<sup>26</sup>. Peptides library synthesis was  
388 performed using Tentagel® NH<sub>2</sub> macrobeads (280-320  $\mu\text{m}$  bead diameter) particle size (~65,550  
389 beads/g) using Fmoc solid-phase peptide synthesis. Each bead only has one peptide sequence. A  
390 photolinker is attached between peptide and bead to allow the UV light-induced cleavage of  
391 homogenous peptide from bead in each well. The quality of the peptide library was verified by  
392 mass spectrometry (e.g. MALDI) and Edman sequencing. After placing one bead in each well of  
393 96-well microplate, the photolinker between peptide and bead was cleaved with 5 hr of low-  
394 power UV light on dry bead, which were spreading to a dispersed single layer in a glass dish. The

395 peptides were each dissolved in DMSO, quantified by tryptophan absorbance using nanodrop,  
396 and stored in -20 °C freezer.

397  
398 **Bulk peptides and chemicals.** The selected LDKA-like peptides were synthesized using standard  
399 Fmoc chemistry and purified to 98% purity using reverse phase HPLC by GenScript, Inc  
400 (Piscataway, NJ, USA). The N-terminus was positively charged amine group and C-terminus is  
401 neutral amide group. Peptide purity and identity were confirmed by HPLC and ESI mass  
402 spectrometry. The solubility test was performed by GenScript, Inc (Table S1).

403  
404 **Large unilamellar vesicle (LUV) preparation.** 1-palmitoyl-2-oleoyl-sn-glycero-3-phosphocholine  
405 (POPC), 1-palmitoyl-2-oleoyl-sn-glycero-3-phospho-(1'-rac-glycerol) (POPG), and hexadecanoyl  
406 sphingomyelin (Egg SM; PSM) were purchased from Avanti Polar Lipids. Lipids were dissolved in  
407 chloroform, mixed, and dried under nitrogen gas in a glass vial. Any remaining chloroform was  
408 removed under vacuum overnight. To make LUVs lipids were resuspended in 10 mM sodium  
409 phosphate buffer (pH = 7) with 100 mM potassium chloride. LUVs were generated by extruding  
410 the lipid suspension 10 times through 0.1 µm nuclepore polycarbonate filters to give LUVs of 100  
411 nm diameter<sup>93</sup>.

412  
413 **ANTS/DPX leakage assay.** 5 mM ANTS and 12.5 mM DPX were entrapped in 0.1 µm diameter  
414 extruded vesicles with lipids<sup>94,95</sup>. Gel filtration chromatography of Sephadex G-100 (GE  
415 Healthcare Life Sciences Inc) was used to remove external free ANTS/DPX from LUVs with  
416 entrapped contents. LUVs were diluted to 0.5 mM and used to measure the leakage activity by  
417 addition of aliquots of LDKA. Leakage was measured after 3 h incubation. 10% Triton was used as  
418 the positive control to measure the maximum leakage of the vesicle. Fluorescence emission  
419 spectra were recorded using excitation and emission wavelength of 350 nm and 510 nm for  
420 ANTS/DPX using a BioTek Synergy H1 Hybrid Multi-Mode Reader.

421  
422 **Macromolecule release assay.** Several different size dextrans were prepared and labelled with  
423 both TAMRA and biotin. Conjugated dextran was entrapped in POPC LUVs as described above<sup>36</sup>.  
424 External dextran was removed by incubation with immobilized streptavidin. Streptavidin labelled  
425 with an Alexa-488 fluorophore was added during the leakage experiment with the peptide. The  
426 sample was incubated for 3 hours before measuring Alexa-488 fluorescence. A control without  
427 added peptide served as the 0% leakage signal and addition of 0.05% vol. Triton X-100 was used  
428 to determine 100% leakage.

429  
430 **Circular dichroism (CD) spectroscopy.** LDKA solutions (50 µM) in 10 mM phosphate buffer (pH  
431 7.0) were co-incubated with 800 µM POPC:POPG (1:1) and POPC:CHOL (7:3) LUVs in identical  
432 buffer (see *LUV preparation* above). CD spectra were recorded using the synchrotron radiation  
433 circular dichroism beamline on ASTRID at Aarhus University. Spectra were recorded from 270 to  
434 170 nm with a step size of  $\Delta\lambda = 0.5$  nm, a bandwidth of 0.5 nm, and a dwell time of 2 s. Each  
435 spectrum was averaged over 3 repeat scans. The averaged spectra were normalized to molar  
436 ellipticity per residue. The raw data were analyzed using DichroWeb  
437 <<http://dichroweb.cryst.bbk.ac.uk/>>.<sup>96-98</sup>

438

439 **Peptide thermostability enables advanced sampling at high temperatures.** The LDKA peptide is  
440 resistant to thermal denaturation when bound to the membrane and the simulated helicity is  
441 comparable to the experiments (Table S2, Table S3, and **Figure S2**)<sup>24,47,53,99-102</sup>. This allows all  
442 simulation to be run at 120 °C, increasing pore-formation kinetics. We have previously  
443 demonstrated that elevating the temperature does not change conformational equilibria or  
444 partitioning free energies of helical membrane-active peptides, provided they are stable against  
445 thermal denaturation (see Supplement); however, the vast increase in sampling kinetics at high  
446 temperatures allows simulation of peptide folding, bilayer partitioning, and pore assembly  
447 without the need for advanced sampling techniques that require additional information or may  
448 bias the system<sup>24,47,53,99-103</sup>.

449  
450 **Tryptophan fluorescent binding assay.** The protocol was modified from the original method  
451 described by Christiaens, et al.<sup>104</sup>. LDKA peptides (50 µM) and POPC/POPG (600 µM) were  
452 prepared in 10 mM phosphate buffer (pH 7.0). The solutions were incubated and measured after  
453 60 minutes. Excitation was fixed at 280 nm (slit 9 nm) and emission was collected from 300 to  
454 450 nm (slit 9 nm). The spectra were recorded using Synergy H1 Hybrid Multi-Mode Reader and  
455 Cytation™ 5 Cell Imaging Multi-Mode Reader from BioTek and were averaged by 3 scans.

456  
457 **Bacterial minimum inhibitory concentration (MIC).** *Escherichia coli* strain ATCC 25922,  
458 *Staphylococcus aureus* strain ATCC 25923, and *Pseudomonas aeruginosa* strain ATCC PAO1 were  
459 used in this study. Overnight cultures were sub-cultured and diluted to an initial bacterial cell  
460 density of  $\sim 3 \times 10^5$  colony forming units (CFU) per mL in Lysogeny broth. Cell counts were  
461 determined by measuring optical density at 600 nm ( $OD_{600}$ ), with an optimal sensitivity at  $OD_{600} =$   
462 0.3-0.6 in a 1 cm path-length cuvette.  $OD_{600} = 1$  corresponds to  $1.5 \times 10^8$  CFU/mL for *S. aureus*,  $5$   
463  $\times 10^8$  CFU/mL for *E. coli*, and  $2.04 \times 10^8$  CFU/mL for *P. aeruginosa*. Bacteria were added to  
464 peptide (LDKA and indolicidin) dilutions (1.3, 2.0, 2.9, 4.4, 6.6, 9.9, 14.8, 22.2, 33.3, 50.0, and 75.0  
465 µM) and co-incubated at 37 °C. After 12 hr incubation, the optical density of the wells were  
466 recorded on a plate reader to determine whether they were sterilized ( $OD_{600} < 0.08$ ) or were at  
467 stationary phase growth ( $OD_{600} > 0.5$ ). Intermediate values, which were rare, were considered  
468 positive for growth. Average minimum sterilizing concentrations were calculated from the lowest  
469 peptide concentration that sterilized the bacteria in each serial dilution. The samples were done  
470 in sextuplet.

471  
472 **Biofilm.** The formation of biofilm and quantification was modified from the method described by  
473 O'Toole, et al.<sup>105</sup>. *Escherichia coli* strain ATCC 25922, *Staphylococcus aureus* strain ATCC 25923  
474 and *Pseudomonas aeruginosa* ATCC PAO1 were overnight cultured to log phase  $OD_{600} = 0.3-0.6$ .  
475 Dilute the overnight culture 1:100 into fresh medium for biofilm assays. Add 100 µL dilutions to  
476 each well and culture it at room temperature without shaking. After 48 hr incubation, remove  
477 the media and rinse each well with 150 µL water for three times. Prepare elevated concentration  
478 of AMPs and treat the biofilm using total 150 µL volume in each well. Incubate it for 3 hr at room  
479 temperature and remove the supernatant. Rinse each well for three times using water. Add 150  
480 µL of a 1% crystal violet in water to each well and incubate the plate at room temperature for 15  
481 min. Rinse the plate three times with water to remove the free crystal violet. Turn the plate  
482 upside down and dry for overnight. Add 150 µL of 30% acetic acid in water to each well of the

483 plate to solubilize the crystal violet on the cells. Incubate the plate at room temperature for 15  
484 min. Transfer 100  $\mu$ L of the solubilized crystal violet to another plate and quantify the  
485 absorbance at 550 nm using Cytation™ 5 Cell Imaging Multi-Mode Reader from BioTek.

486  
487 **Drug resistant *Escherichia coli*.** *Escherichia coli* strain ATCC 25922 was overnight cultured to log  
488 phase  $OD_{600} = 0.3-0.6$ . Initial bacterial cell density was prepared with  $\sim 3 \times 10^5$  CFU/mL in LB broth  
489 in 96-well plate. Bacteria were added to serially diluted antibiotics (e.g. ceftazidime, ciprofloxacin,  
490 streptomycin, and gentamicin) and co-incubated at 37 °C. After 12 hr incubation, the optical  
491 density of each well was recorded on a plate reader to determine whether they were sterilized or  
492 were at stationary phase growth. The *E. coli* which survived at the highest antibiotic  
493 concentration (below or near the MIC) was collected and cultured for another generation. This  
494 cycle is repeated for 10 times until the *e. coli* have resistant (2-fold higher MIC than its wildtype)  
495 against the antibiotics.

496  
497 **Hemolysis assay.** Fresh human red blood cells were obtained from Interstate Blood Bank, Inc.,  
498 and thoroughly washed in PBS until the supernatant was clear. hRBC concentration was  
499 determined using a standard hemocytometer. In hemolysis assays serial dilutions of peptide  
500 were prepared, followed by the addition of  $2 \times 10^8$  hRBC/mL. After incubation for 1 hr at 37 °C  
501 the cells were centrifuged, and the released hemoglobin was measured by optical absorbance of  
502 the heme group (410 nm). Negative control was buffer only (0% lysis), and the positive controls  
503 were 20  $\mu$ M melittin and distilled water (100% lysis). The measurements were made in triplicate.  
504

505 **Molecular dynamics simulations and analysis.** Unbiased all-atom MD simulations were  
506 performed and analyzed using GROMACS 5.0.4<sup>106</sup> and Hippo BETA simulation packages  
507 <<http://www.biowerkzeug.com>>, and VMD molecular visualization program<sup>107</sup>  
508 <<http://www.ks.uiuc.edu/Research/vmd/>>. The pdb structure of extended peptides (GL<sub>5</sub>KL<sub>6</sub>G,  
509 LDKL, and LDKA) were generated using Hippo BETA (see Table S1, Table S2, and Table S3). These  
510 initial structures were relaxed via 200 Monte Carlo steps, with water treated implicitly using a  
511 Generalized Born solvent.

512 After relaxation, the peptides were placed in all atom peptide/lipid/water systems  
513 containing model membranes with 100 mM K and Cl ions using CHARMM-GUI<sup>108</sup>  
514 <<http://www.charmm-gui.org/>>. Four helical peptides were initially placed on both interfaces of  
515 the bilayer and equilibrated and relaxed for  $\sim 600$  ns. After equilibration, the system was  
516 multiplied by 2x2 matrix in both the x and y directions and results in a bigger system with total 16  
517 surface-bound peptides on the bilayer. The simulations were performed at 120 °C to speed up  
518 the kinetics, and we confirmed their simulated helicity with the liquid-state circular dichroism  
519 spectroscopy (Table S2 and Figure S2). MD simulations were performed with GROMACS 5.0.4  
520 using the CHARMM36 force field<sup>109</sup>, in conjunction with the TIP3P water model<sup>110</sup>. Electrostatic  
521 interactions were computed using PME, and a cut-off of 10 Å was used for van der Waals  
522 interactions. Bonds involving hydrogen atoms were constrained using LINCS. The integration  
523 time-step was 2 fs and neighbor lists were updated every 5 steps. All simulations were  
524 performed in the NPT ensemble, without any restraints or biasing potentials. Water and the  
525 protein were each coupled separately to a heat bath with a time constant  $\tau_T = 0.5$  ps using  
526 velocity rescale temperature coupling. The atmospheric pressure of 1 bar was maintained using

527 weak semi-isotropic pressure coupling with compressibility  $\kappa_z = \kappa_{xy} = 4.6 \cdot 10^{-5} \text{ bar}^{-1}$  and time  
528 constant  $\tau_p = 1 \text{ ps}$ .

529  
530 **Oligomer population analysis.** In order to reveal the most populated pore assemblies during the  
531 simulations, a complete list of all oligomers was constructed for each trajectory frame. An  
532 oligomer of order  $n$  was considered any set of  $n$  peptides that are in mutual contact, defined as a  
533 heavy-atom (N, C, O) minimum distance of  $<3.5 \text{ \AA}$ . Frequently, this definition overcounts the  
534 oligomeric state due to numerous transient surface bound (S-state) peptides that are only loosely  
535 attached to the transmembrane inserted peptides that make up the core of the oligomer. These  
536 S-state peptides frequently change position or drift on and off the stable part of the pore. To  
537 focus the analysis on true longer-lived TM pores, a cut-off criterion of  $65^\circ$  was introduced for the  
538 tilt angle  $\tau$  of the peptides. Any peptide with  $\tau \geq 65^\circ$  was considered in the S-state and removed  
539 from the oligomeric analysis. This strategy greatly reduced the noise in the oligomeric clustering  
540 algorithm by focusing on the true longer-lived pore structures. Population plots of the  
541 occupation percentage of oligomer  $n$  multiplied by its number of peptides  $n$ , were then  
542 constructed. These reveal how much peptide mass was concentrated in which oligomeric state  
543 during the simulation time.

#### 544 545 **Membrane partitioning and secondary structure.**

546 Peptide solutions (50  $\mu\text{M}$  peptide concentration) were titrated with POPC and POPG LUVs  
547 (between 0-5 mM) and the corresponding changes of tryptophan fluorescent spectra were  
548 collected (**Figure S1**). 7F3 and 28H6 show maximum fluorescent emission of  $\sim 331 \text{ nm}$  in  
549 phosphate buffer, suggesting aggregate formation. Other peptides have tryptophan fluorescence  
550 peaks at  $\sim 348 \text{ nm}$ , indicative of monomeric peptides or low multimeric soluble aggregates.  
551 Change of the maximum wavelength indicates the partitioning between water and lipid phases. It  
552 gives a direct measure of the binding free energy ( $\Delta G_{\text{binding}}$ ) for each peptide with different lipids.  
553 Binding free energy of toxic peptides (**Figure S1a-j**; 4H9, 7F3, 28H6, and 25B2), which porate both  
554 POPC and POPG LUVs, are between -5.5 and -9.5 kcal/mol. The membrane-selective peptides  
555 (**Figure S1k-r**; 7G6, 7D12, 11D12, and 24F1) have lower binding free energy toward POPC LUV  
556 ( $\Delta G_{\text{binding}} = -4.0$  to  $-5.7 \text{ kcal/mol}$ ) than POPG LUV ( $\Delta G_{\text{binding}} = -5.7$  to  $-7.1 \text{ kcal/mol}$ ). It shows that  
557 the strength of peptide binding is essential for membrane-selectivity and  $\Delta G_{\text{binding}} = -5.7 \text{ kcal/mol}$   
558 is the cut-off.

559 We further performed CD spectroscopy to study the secondary structure of these  
560 peptides with each POPC and POPG LUVs at elevated temperature (**Figure S2 and Table S2**). CD  
561 spectroscopy shows that all the toxic peptides are helical structure (54-75% helicity) in the  
562 solution, and membrane-selective peptides are mostly coiled structure (22-38% helicity). The  
563 secondary structure of the peptides in solution explain why these LDKA analogues have  
564 selectivity toward different membrane types and result in different binding free energy. Coiled  
565 structure exposes its intramolecular hydrogen bonds to water that make the compound more  
566 polar; in opposite, helical structure makes it more hydrophobic. Therefore, toxic peptides have  
567 higher helical content and strong interaction with both membrane types. Interestingly, 28H6 only  
568 folds beta-strand structure in POPG LUV, and the temperature at  $95^\circ \text{ C}$  can break the  
569 intermolecular hydrogen bonds and reverse it to helix. As expected, the membrane-selective  
570 peptides only fold helix in POPG LUV and have no response to POPC LUV. Most of the helical

571 structures are highly resistant to thermal denaturation (at 95 °C) when they once fold in the  
572 membrane (**Figure S2**).

573 The linear regression analysis shows strong correlation between hydrophobic moments,  
574 helicity in POPC LUV, and ANTS/DPX leakage fraction from POPC LUV (**Figure S3a**). It confirms the  
575 interaction between peptide and POPC LUV is strongly dependent on the peptide's hydrophobic  
576 moment; however, it does not correlate to the membrane pore size. **Figure S3b** shows that the  
577 helicity of a peptide is linearly correlated to the hydrophobic moment, which is promoted by the  
578 hydrophobicity. We further analyzed the AMPs from *APD* that have peptide length between 5  
579 and 30 amino acids, which dominate >50% peptide population (1,500 AMPs) in *APD*. We grouped  
580 the AMPs by their peptide length and averaged each of their net charge and hydrophobic  
581 moment. It shows that increased hydrophobic moment corresponds to higher net charge (**Figure**  
582 **S4a**).

583 We analyzed the sequence of LDKA analogues and compared them to the AMPs from *APD*  
584 that have same peptide length to LDKA (**Figure S4b**). It showed that the toxic LDKA peptides have  
585 higher hydrophobic moment 3.41-4.78 than membrane-selective LDKA peptides with  
586 hydrophobic moment 1.92-3.32 (Table 1), which correspond to their specificity toward different  
587 membrane types (**Figure S4c**) and toxicity to human red blood cell (**Figure S4d**). We found  
588 hydrophobic moment 3.37 is a cut-off between membrane-selective and toxic peptides in the  
589 LDKA library peptides. However, the cut-off may shift in different peptide length and charge  
590 distribution (**Figure S4e-h and Table S5**); therefore, bigger sample size is necessary to improve  
591 this sequence-based prediction of membrane selectivity.

592

### 593 **Data availability**

594 The data that support the findings of this study are available from the corresponding author on  
595 reasonable request.

596

### 597 **Acknowledgements**

598 We thank the Karlsruhe Institute of Technology (KIT) ANKA synchrotron CD beamline staff for  
599 support and beamtime. We thank Jochen Bürck at KIT for valuable discussion and technical  
600 support for ANKA synchrotron CD beamline. We thank Guangshun Wang at the University of  
601 Nebraska Medical Center for providing the raw data of the antimicrobial peptide database. We  
602 thank Katherine Tripp at the Center for Molecular Biophysics, Johns Hopkins University for  
603 helping the experimental setup for isothermal titration calorimeter. We thank Jodie Franklin at  
604 the Synthesis and Sequencing Facility at the Johns Hopkins University School of Medicine for  
605 sequencing the LDKA peptides. We thank Kalina Hristova and Honggang Cui at Johns Hopkins  
606 University and Gregory Wiedman at Seton Hall University and Bonnie Wallace at Birkbeck,  
607 University of London and Matthew Upton at University of Plymouth for valuable discussions.  
608 Simulation resources were supported by the MARCC supercomputer facility at Johns Hopkins  
609 University.

610

### 611 **Author contributions**

612 CHC, JPU, MBU and WCW designed the research. CHC performed most of the experiments and  
613 MD simulations. CGS performed hemolysis assay. CGS and CHC performed *in-vitro* bacterial  
614 minimum inhibitory concentration assay and bacterial biofilm assay. SG and CHC performed the

615 minimum inhibitory concentration assay with drug resistant *E. coli*. JPU, CHC, and MBU analyzed  
616 the simulations. CHC, JPU, MBU and WCW wrote the paper, with input from the other authors.

617

618 **Additional Information**

619 **Supplementary Information:** The Supporting Information is available free of charge on the ACS  
620 Publications website.

621 **Competing financial interests:** The authors declare no competing financial interests.

622

## 623 References

- 624 (1) Lazzaro, B. P.; Zasloff, M.; Rolff, J. *Science* **2020**, 368.
- 625 (2) Chen, C. H.; Lu, T. K. *Antibiotics (Basel)* **2020**, 9.
- 626 (3) Lei, J.; Sun, L.; Huang, S.; Zhu, C.; Li, P.; He, J.; Mackey, V.; Coy, D. H.; He, Q. *Am J Transl Res* **2019**,  
627 11, 3919.
- 628 (4) Lee, A. C.; Harris, J. L.; Khanna, K. K.; Hong, J. H. *Int J Mol Sci* **2019**, 20.
- 629 (5) Biswaro, L. S.; da Costa Sousa, M. G.; Rezende, T. M. B.; Dias, S. C.; Franco, O. L. *Front Microbiol*  
630 **2018**, 9, 855.
- 631 (6) Magana, M.; Pushpanathan, M.; Santos, A. L.; Leanse, L.; Fernandez, M.; Ioannidis, A.; Giulianotti,  
632 M. A.; Apidianakis, Y.; Bradfute, S.; Ferguson, A. L.; Cherkasov, A.; Seleem, M. N.; Pinilla, C.; de la Fuente-Nunez, C.;  
633 Lazaridis, T.; Dai, T.; Houghten, R. A.; Hancock, R. E. W.; Tegos, G. P. *The Lancet. Infectious diseases* **2020**, 20, e216.
- 634 (7) Cardoso, M. H.; Orozco, R. Q.; Rezende, S. B.; Rodrigues, G.; Oshiro, K. G. N.; Candido, E. S.; Franco,  
635 O. L. *Frontiers in microbiology* **2019**, 10, 3097.
- 636 (8) Huang, H. W. *Biochimica et biophysica acta. Biomembranes* **2020**, 1862, 183395.
- 637 (9) Simon, M. D.; Heider, P. L.; Adamo, A.; Vinogradov, A. A.; Mong, S. K.; Li, X.; Berger, T.; Policarpo, R.  
638 L.; Zhang, C.; Zou, Y.; Liao, X.; Spokoyny, A. M.; Jensen, K. F.; Pentelute, B. L. *Chembiochem* **2014**, 15, 713.
- 639 (10) Mijalis, A. J.; Thomas, D. A.; Simon, M. D.; Adamo, A.; Beaumont, R.; Jensen, K. F.; Pentelute, B. L.  
640 *Nat Chem Biol* **2017**, 13, 464.
- 641 (11) Cao, J.; de la Fuente-Nunez, C.; Ou, R. W.; Torres, M. T.; Pande, S. G.; Sinskey, A. J.; Lu, T. K. *ACS*  
642 *Synth Biol* **2018**, 7, 896.
- 643 (12) Wibowo, D.; Zhao, C. X. *Appl Microbiol Biotechnol* **2019**, 103, 659.
- 644 (13) Hartrampf, N.; Saebi, A.; Poskus, M.; Gates, Z. P.; Callahan, A. J.; Cowfer, A. E.; Hanna, S.; Antilla, S.;  
645 Schissel, C. K.; Quartararo, A. J.; Ye, X.; Mijalis, A. J.; Simon, M. D.; Loas, A.; Liu, S.; Jessen, C.; Nielsen, T. E.; Pentelute,  
646 B. L. *Science* **2020**, 368, 980.
- 647 (14) Guha, S.; Ghimire, J.; Wu, E.; Wimley, W. C. *Chem Rev* **2019**.
- 648 (15) Rathinakumar, R.; Wimley, W. C. *J Am Chem Soc* **2008**, 130, 9849.
- 649 (16) Carney, R. P.; Thillier, Y.; Kiss, Z.; Sahabi, A.; Heleno Campos, J. C.; Knudson, A.; Liu, R.; Olivos, D.;  
650 Saunders, M.; Tian, L.; Lam, K. S. *ACS Comb Sci* **2017**, 19, 299.
- 651 (17) Vinogradov, A. A.; Gates, Z. P.; Zhang, C.; Quartararo, A. J.; Halloran, K. H.; Pentelute, B. L. *ACS*  
652 *Comb Sci* **2017**, 19, 694.
- 653 (18) Quartararo, A. J.; Gates, Z. P.; Somsen, B. A.; Hartrampf, N.; Ye, X.; Shimada, A.; Kajihara, Y.;  
654 Ottmann, C.; Pentelute, B. L. *Nat Commun* **2020**, 11, 3183.
- 655 (19) Zasloff, M. *Proc Natl Acad Sci U S A* **1987**, 84, 5449.
- 656 (20) Lehrer, R. I.; Barton, A.; Daher, K. A.; Harwig, S. S.; Ganz, T.; Selsted, M. E. *J Clin Invest* **1989**, 84, 553.
- 657 (21) Yeaman, M. R.; Yount, N. Y. *Pharmacol Rev* **2003**, 55, 27.
- 658 (22) Chen, C. H.; Ulmschneider, J. P.; Ulmschneider, M. B. *Australian Journal of Chemistry* **2020**, 73, 236.
- 659 (23) Mishra, B.; Wang, G. *J Am Chem Soc* **2012**, 134, 12426.
- 660 (24) Chen, C.; Starr, C. G.; Troendle, E. P.; Wiedman, G.; Wimley, W. C.; Ulmschneider, J. P.;  
661 Ulmschneider, M. B. *J Am Chem Soc* **2019**.
- 662 (25) Ablan, F. D.; Spaller, B. L.; Abdo, K. I.; Almeida, P. F. *Biophys J* **2016**, 111, 1738.
- 663 (26) Krauson, A. J.; He, J.; Wimley, W. C. *J Am Chem Soc* **2012**, 134, 12732.
- 664 (27) Wiedman, G.; Kim, S. Y.; Zapata-Mercado, E.; Wimley, W. C.; Hristova, K. *J Am Chem Soc* **2017**, 139,  
665 937.
- 666 (28) Torres, M. D. T.; Pedron, C. N.; Higashikuni, Y.; Kramer, R. M.; Cardoso, M. H.; Oshiro, K. G. N.;  
667 Franco, O. L.; Silva Junior, P. I.; Silva, F. D.; Oliveira Junior, V. X.; Lu, T. K.; de la Fuente-Nunez, C. *Commun Biol* **2018**, 1,  
668 221.
- 669 (29) Porto, W. F.; Irazazabal, L.; Alves, E. S. F.; Ribeiro, S. M.; Matos, C. O.; Pires, Á.; Fensterseifer, I. C.  
670 M.; Miranda, V. J.; Haney, E. F.; Humblot, V.; Torres, M. D. T.; Hancock, R. E. W.; Liao, L. M.; Ladram, A.; Lu, T. K.; de  
671 la Fuente-Nunez, C.; Franco, O. L. *Nat Commun* **2018**, 9, 1490.
- 672 (30) Li, S.; Kim, S. Y.; Pittman, A. E.; King, G. M.; Wimley, W. C.; Hristova, K. *Journal of the American*  
673 *Chemical Society* **2018**, 140, 6441.
- 674 (31) Haney, E. F.; Brito-Sanchez, Y.; Trimble, M. J.; Mansour, S. C.; Cherkasov, A.; Hancock, R. E. W. *Sci*  
675 *Rep* **2018**, 8, 1871.



- 676 (32) Mishra, B.; Lakshmaiah Narayana, J.; Lushnikova, T.; Wang, X.; Wang, G. *Proc Natl Acad Sci U S A*  
677 **2019**, *116*, 13517.
- 678 (33) Hu, X.; Liao, M.; Gong, H.; Zhang, L.; Cox, H.; Waigh, T. A.; Lu, J. R. *Current Opinion in Colloid &*  
679 *Interface Science* **2020**, *45*, 1.
- 680 (34) Gong, H.; Zhang, J.; Hu, X.; Li, Z.; Fa, K.; Liu, H.; Waigh, T. A.; McBain, A.; Lu, J. R. *ACS applied*  
681 *materials & interfaces* **2019**, *11*, 34609.
- 682 (35) Huang, H. W.; Charron, N. E. *Quarterly reviews of biophysics* **2017**, *50*, e10.
- 683 (36) Wiedman, G.; Fuselier, T.; He, J.; Searson, P. C.; Hristova, K.; Wimley, W. C. *J Am Chem Soc* **2014**,  
684 *136*, 4724.
- 685 (37) Krauson, A. J.; Hall, O. M.; Fuselier, T.; Starr, C. G.; Kauffman, W. B.; Wimley, W. C. *J Am Chem Soc*  
686 **2015**, *137*, 16144.
- 687 (38) Libardo, M. D. J.; Bahar, A. A.; Ma, B.; Fu, R.; McCormick, L. E.; Zhao, J.; McCallum, S. A.; Nussinov,  
688 R.; Ren, D.; Angeles-Boza, A. M.; Cotten, M. L. *The FEBS journal* **2017**, *284*, 3662.
- 689 (39) Lakshmaiah Narayana, J.; Mishra, B.; Lushnikova, T.; Wu, Q.; Chhonker, Y. S.; Zhang, Y.; Zarena, D.;  
690 Salnikov, E. S.; Dang, X.; Wang, F.; Murphy, C.; Foster, K. W.; Gorantla, S.; Bechinger, B.; Murry, D. J.; Wang, G. *Proc*  
691 *Natl Acad Sci U S A* **2020**, *117*, 19446.
- 692 (40) Wiedman, G.; Wimley, W. C.; Hristova, K. *Biochim Biophys Acta* **2015**, *1848*, 951.
- 693 (41) Kim, S. Y.; Pittman, A. E.; Zapata-Mercado, E.; King, G. M.; Wimley, W. C.; Hristova, K. *Journal of the*  
694 *American Chemical Society* **2019**, *141*, 6706.
- 695 (42) Mihailescu, M.; Sorci, M.; Seckute, J.; Silin, V. I.; Hammer, J.; Perrin, B. S., Jr.; Hernandez, J. I.;  
696 Smajic, N.; Shrestha, A.; Bogardus, K. A.; Greenwood, A. I.; Fu, R.; Blazyk, J.; Pastor, R. W.; Nicholson, L. K.; Belfort, G.;  
697 Cotten, M. L. *J Am Chem Soc* **2019**, *141*, 9837.
- 698 (43) Grau-Campistany, A.; Strandberg, E.; Wadhvani, P.; Reichert, J.; Bürck, J.; Rabanal, F.; Ulrich, A. S.  
699 *Sci Rep* **2015**, *5*, 9388.
- 700 (44) Grau-Campistany, A.; Strandberg, E.; Wadhvani, P.; Rabanal, F.; Ulrich, A. S. *J Phys Chem Lett* **2016**,  
701 *7*, 1116.
- 702 (45) Chen, C. H.; Melo, M. C.; Berglund, N.; Khan, A.; de la Fuente, C.; Ulmschneider, J. P.; Ulmschneider,  
703 M. B. *Curr Opin Struct Biol* **2020**, *61*, 160.
- 704 (46) Wiedman, G.; Kim, S. Y.; Zapata-Mercado, E.; Wimley, W. C.; Hristova, K. *Journal of the American*  
705 *Chemical Society* **2017**, *139*, 937.
- 706 (47) Ulmschneider, M. B.; Ulmschneider, J. P.; Schiller, N.; Wallace, B. A.; von Heijne, G.; White, S. H.  
707 *Nat Commun* **2014**, *5*, 4863.
- 708 (48) Chen, C. H.; Ulmschneider, J. P.; Ulmschneider, M. B. *Australian Journal of Chemistry* **2020**, *73*, 236.
- 709 (49) Wang, G.; Li, X.; Wang, Z. *Nucleic Acids Res* **2016**, *44*, D1087.
- 710 (50) Sani, M. A.; Lee, T. H.; Aguilar, M. I.; Separovic, F. *Biochim Biophys Acta* **2015**, *1848*, 2277.
- 711 (51) Fernandez, D. I.; Lee, T. H.; Sani, M. A.; Aguilar, M. I.; Separovic, F. *Biophys J* **2013**, *104*, 1495.
- 712 (52) Walther, T. H.; Ulrich, A. S. *Curr Opin Struct Biol* **2014**, *27*, 63.
- 713 (53) Wang, Y.; Chen, C. H.; Hu, D.; Ulmschneider, M. B.; Ulmschneider, J. P. *Nat Commun* **2016**, *7*, 13535.
- 714 (54) Prates, M. V.; Sforca, M. L.; Regis, W. C.; Leite, J. R.; Silva, L. P.; Pertinhez, T. A.; Araujo, A. L.;  
715 Azevedo, R. B.; Spisni, A.; Bloch, C., Jr. *J Biol Chem* **2004**, *279*, 13018.
- 716 (55) Wu, J.; Liu, H.; Yang, H.; Yu, H.; You, D.; Ma, Y.; Ye, H.; Lai, R. *J Proteome Res* **2011**, *10*, 4230.
- 717 (56) Dempsey, C. E.; Bazzo, R.; Harvey, T. S.; Syperek, I.; Boheim, G.; Campbell, I. D. *FEBS Lett* **1991**, *281*,  
718 240.
- 719 (57) Rex, S. *Biophys Chem* **2000**, *85*, 209.
- 720 (58) Laursen, R. A. *Eur J Biochem* **1971**, *20*, 89.
- 721 (59) Willyard, C. *Nature* **2017**, *543*, 15.
- 722 (60) Rodríguez-Rojas, A.; Moreno-Morales, J.; Mason, A. J.; Rolff, J. *Biol Lett* **2018**, *14*.
- 723 (61) Maria-Neto, S.; de Almeida, K. C.; Macedo, M. L.; Franco, O. L. *Biochim Biophys Acta* **2015**, *1848*,  
724 3078.
- 725 (62) Richards, D. M.; Brogden, R. N. *Drugs* **1985**, *29*, 105.
- 726 (63) Yost, R. L.; Rampal, R. *Drug Intell Clin Pharm* **1985**, *19*, 509.
- 727 (64) Drlica, K.; Zhao, X. *Microbiol Mol Biol Rev* **1997**, *61*, 377.
- 728 (65) Luzzatto, L.; Apirion, D.; Schlessinger, D. *Proc Natl Acad Sci U S A* **1968**, *60*, 873.

- 729 (66) Hahn, F. E.; Sarre, S. G. *J Infect Dis* **1969**, *119*, 364.
- 730 (67) Costerton, J. W.; Stewart, P. S.; Greenberg, E. P. *Science* **1999**, *284*, 1318.
- 731 (68) Hall-Stoodley, L.; Costerton, J. W.; Stoodley, P. *Nat Rev Microbiol* **2004**, *2*, 95.
- 732 (69) Stewart, P. S.; Costerton, J. W. *Lancet* **2001**, *358*, 135.
- 733 (70) Nešuta, O.; Hexnerová, R.; Buděšínský, M.; Slaninová, J.; Bednářová, L.; Hadravová, R.; Straka, J.;  
734 Veverka, V.; Čeřovský, V. *J Nat Prod* **2016**, *79*, 1073.
- 735 (71) Eisenberg, D.; Weiss, R. M.; Terwilliger, T. C. *Nature* **1982**, *299*, 371.
- 736 (72) Wimley, W. C.; White, S. H. *Nat Struct Biol* **1996**, *3*, 842.
- 737 (73) Wimley, W. C.; Creamer, T. P.; White, S. H. *Biochemistry* **1996**, *35*, 5109.
- 738 (74) White, S. H.; Wimley, W. C. *Biochim Biophys Acta* **1998**, *1376*, 339.
- 739 (75) White, S. H.; Wimley, W. C. *Annu Rev Biophys Biomol Struct* **1999**, *28*, 319.
- 740 (76) Reißer, S.; Strandberg, E.; Steinbrecher, T.; Ulrich, A. S. *Biophys J* **2014**, *106*, 2385.
- 741 (77) Bennett, W. F.; Hong, C. K.; Wang, Y.; Tieleman, D. P. *J Chem Theory Comput* **2016**, *12*, 4524.
- 742 (78) Leveritt, J. M., 3rd; Pino-Angeles, A.; Lazaridis, T. *Biophys J* **2015**, *108*, 2424.
- 743 (79) Pino-Angeles, A.; Leveritt, J. M., III; Lazaridis, T. *PLoS Comput Biol* **2016**, *12*, e1004570.
- 744 (80) Pino-Angeles, A.; Lazaridis, T. *Biophysical Journal* **2018**, *114*, 2865.
- 745 (81) Lipkin, R.; Pino-Angeles, A.; Lazaridis, T. *The Journal of Physical Chemistry B* **2017**, *121*, 9126.
- 746 (82) Sepehri, A.; PeBenito, L.; Pino-Angeles, A.; Lazaridis, T. *Biophysical Journal* **2020**, *118*, 1901.
- 747 (83) Perrin, B. S.; Pastor, Richard W. *Biophysical Journal* **2016**, *111*, 1248.
- 748 (84) Perrin, B. S., Jr.; Fu, R.; Cotten, M. L.; Pastor, R. W. *Biophys J* **2016**, *111*, 1258.
- 749 (85) Berkowitz, M. In *Current Topics in Membranes*; Bennett, V., Ed.; Academic Press: 2016; Vol. 77, p 1.
- 750 (86) Tieleman, D. P. *Biophysical Journal* **2017**, *113*, 1.
- 751 (87) Ulmschneider, J. P. *Biophysical Journal* **2017**, *113*, 73.
- 752 (88) Ulmschneider, J. P.; Smith, J. C.; White, S. H.; Ulmschneider, M. B. *Biochimica et Biophysica Acta*  
753 (*BBA*) - *Biomembranes* **2018**, *1860*, 2539.
- 754 (89) McCarter, J. D.; Stephens, D.; Shoemaker, K.; Rosenberg, S.; Kirsch, J. F.; Georgiou, G. *J Bacteriol*  
755 **2004**, *186*, 5919.
- 756 (90) Torres, M. T.; de la Fuente-Nunez, C. *Curr Opin Microbiol* **2019**, *51*, 30.
- 757 (91) Wu, Z.; Kan, S. B. J.; Lewis, R. D.; Wittmann, B. J.; Arnold, F. H. *Proc Natl Acad Sci U S A* **2019**, *116*,  
758 8852.
- 759 (92) Yang, J. H.; Wright, S. N.; Hamblin, M.; McCloskey, D.; Alcantar, M. A.; Schrübbers, L.; Lopatkin, A. J.;  
760 Satish, S.; Nili, A.; Palsson, B. O.; Walker, G. C.; Collins, J. J. *Cell* **2019**, *177*, 1649.
- 761 (93) MacDonald, R. C.; MacDonald, R. I.; Menco, B. P.; Takeshita, K.; Subbarao, N. K.; Hu, L. R. *Biochim*  
762 *Biophys Acta* **1991**, *1061*, 297.
- 763 (94) Ladokhin, A. S.; Wimley, W. C.; White, S. H. *Biophys J* **1995**, *69*, 1964.
- 764 (95) Wimley, W. C.; Selsted, M. E.; White, S. H. *Protein Sci* **1994**, *3*, 1362.
- 765 (96) Whitmore, L.; Wallace, B. A. *Biopolymers* **2008**, *89*, 392.
- 766 (97) Whitmore, L.; Wallace, B. A. *Nucleic Acids Res* **2004**, *32*, W668.
- 767 (98) Lobley, A.; Whitmore, L.; Wallace, B. A. *Bioinformatics* **2002**, *18*, 211.
- 768 (99) Ulmschneider, M. B.; Ulmschneider, J. P. *J Chem Theory Comput* **2008**, *4*, 1807.
- 769 (100) Ulmschneider, M. B.; Doux, J. P.; Killian, J. A.; Smith, J. C.; Ulmschneider, J. P. *J Am Chem Soc* **2010**,  
770 *132*, 3452.
- 771 (101) Ulmschneider, J. P.; Smith, J. C.; White, S. H.; Ulmschneider, M. B. *J Am Chem Soc* **2011**, *133*, 15487.
- 772 (102) Chen, C. H.; Wiedman, G.; Khan, A.; Ulmschneider, M. B. *Biochim Biophys Acta* **2014**, *1838*, 2243.
- 773 (103) Chen, C. H.; Khan, A.; Huang, J. J.; Ulmschneider, M. B. *Chemistry* **2016**, *22*, 9958.
- 774 (104) Christiaens, B.; Symoens, S.; Verheyden, S.; Engelborghs, Y.; Joliot, A.; Prochiantz, A.;  
775 Vandekerckhove, J.; Rosseneu, M.; Vanloo, B.; Vanderheyden, S. *Eur J Biochem* **2002**, *269*, 2918.
- 776 (105) O'Toole, G. A. *J Vis Exp* **2011**.
- 777 (106) Pronk, S.; Páll, S.; Schulz, R.; Larsson, P.; Bjelkmar, P.; Apostolov, R.; Shirts, M. R.; Smith, J. C.;  
778 Kasson, P. M.; van der Spoel, D.; Hess, B.; Lindahl, E. *Bioinformatics* **2013**, *29*, 845.
- 779 (107) Humphrey, W.; Dalke, A.; Schulten, K. *J Mol Graph* **1996**, *14*, 33.

- 780 (108) Lee, J.; Cheng, X.; Swails, J. M.; Yeom, M. S.; Eastman, P. K.; Lemkul, J. A.; Wei, S.; Buckner, J.; Jeong,  
781 J. C.; Qi, Y.; Jo, S.; Pande, V. S.; Case, D. A.; Brooks, C. L.; MacKerell, A. D.; Klauda, J. B.; Im, W. *J Chem Theory Comput*  
782 **2016**, *12*, 405.  
783 (109) Huang, J.; MacKerell, A. D. *J Comput Chem* **2013**, *34*, 2135.  
784 (110) Jorgensen, W. L.; Chandrasekhar, J.; Madura, J. D. *The Journal of Chemical Physics*, 1983; Vol. 79.  
785  
786

787 **Table 1**

|                      | Pore size | LDKA  | Sequence <sup>†</sup> | ANTS/DPX |          | 3-kDa Dextran |          | Charge | Hydrophobic moment |
|----------------------|-----------|-------|-----------------------|----------|----------|---------------|----------|--------|--------------------|
|                      |           |       |                       | POPC [%] | POPG [%] | POPC [%]      | POPG [%] |        |                    |
| <b>PG&gt;PC</b>      | Large‡    | WT    | GLLDLLKLLLKAAG_       | 72       | 92       | 25            | 89       | +1     | 4.24               |
| <b>Non-selective</b> | Small     | 7F3   | GLADLAKLLKLLGW        | 79       | 100      | 1             | 47       | +2     | 4.15               |
|                      | Large     | 28H6  | GLLDLLKLLLKLAGW       | 89       | 99       | 40            | 67       | +2     | 3.41               |
|                      | Large‡    | 25B2  | GLDDLAKLLKLAGW        | 88       | 93       | 2             | 100      | +1     | 4.78               |
| <b>PC&gt;PG</b>      | Small     | 4H9   | GLDDLKALLKAAGW        | 100      | 41       | 0             | -        | +1     | 4.09               |
| <b>PG&gt;PC</b>      | Small     | 7D12  | GLLDDAKLLAKLAGW       | 0        | 97       | -             | 18       | +1     | 1.92               |
|                      | Small     | 7G6   | GLLDLPKALAKLAGW       | 40       | 99       | -             | 0        | +2     | 3.32               |
|                      | Large     | 11D12 | GLDAAKLLKKAAGW        | 2        | 95       | -             | 58       | +2     | 2.55               |
|                      | Large     | 24F1  | GLLDAAKLLAKAAGW       | 9        | 94       | -             | 69       | +2     | 2.35               |

788  
 789 **Table 1.** LDKA and its selected variants induce fluorescent dyes (ANTS/DPX and 3-kDa) release  
 790 from each POPC and POPG LUVs with P:L = 1:1000 at pH 7 phosphate buffer. The fluorescent dye  
 791 leakage fraction has been normalized to fit between 0 and 100 % by the positive control (LUV  
 792 with potent peptide) and negative control (LUV with non-active peptide). <sup>†</sup>N-terminus is free, C-  
 793 terminus: -NH<sub>2</sub>. <sup>‡</sup>Large pore for PG only.

794  
 795

796 **Table 2**

|                      | Pore size | LDKA  | Minimum Inhibitory Concentration<br>[ $\mu\text{M}$ ( $\mu\text{g}/\text{mL}$ )] |                      |                    |                      | Hemolysis<br>[ $\mu\text{M}$ ( $\mu\text{g}/\text{mL}$ )] |
|----------------------|-----------|-------|----------------------------------------------------------------------------------|----------------------|--------------------|----------------------|-----------------------------------------------------------|
|                      |           |       | <i>E. coli</i>                                                                   | <i>S. aureus</i>     | <i>MRSA</i>        | <i>P. aeruginosa</i> | HC <sub>50</sub>                                          |
| <b>PG&gt;PC</b>      | Large‡    | WT    | 35 ± 9<br>(24 ± 6)                                                               | 10 ± 0<br>(7 ± 0)    | 38 ± 9<br>(26 ± 6) | 66 ± 14<br>(46 ± 10) | 55.1<br>(38.3)                                            |
|                      | Small     | 7F3   | 57 ± 28<br>(35 ± 17)                                                             | 3 ± 1<br>(2 ± 1)     | 29 ± 7<br>(18 ± 4) | NDA                  | 1.1<br>(0.7)                                              |
| <b>Non-selective</b> | Large     | 28H6  | NDA                                                                              | NDA                  | NDA                | NDA                  | 1.2<br>(0.7)                                              |
|                      | Large‡    | 25B2  | 22 ± 0<br>(14 ± 0)                                                               | 11 ± 3<br>(7 ± 2)    | NDA                | NDA                  | 35.5<br>(21.8)                                            |
| <b>PC&gt;PG</b>      | Small     | 4H9   | 33 ± 14<br>(21 ± 9)                                                              | 66 ± 16<br>(42 ± 10) | NDA                | NDA                  | 56.6<br>(35.8)                                            |
|                      | Small     | 7D12  | NDA                                                                              | NDA                  | NDA                | NDA                  | ≥100                                                      |
| <b>PG&gt;PC</b>      | Small     | 7G6   | 19 ± 5<br>(12 ± 3)                                                               | NDA                  | NDA                | NDA                  | ≥100                                                      |
|                      | Large     | 11D12 | 44 ± 10<br>(29 ± 7)                                                              | NDA                  | NDA                | NDA                  | ≥100                                                      |
|                      | Large     | 24F1  | 38 ± 9<br>(25 ± 6)                                                               | NDA                  | NDA                | 66 ± 16<br>(44 ± 11) | ≥100                                                      |

797  
 798 **Table 2.** *In-vitro* experiments of LDKA analogues show their minimum inhibitory concentration  
 799 with *E. coli*, *S. aureus*, and *P. aeruginosa*, and hemolysis shows their hemolytic activity at the  
 800 corresponding peptide concentrations. HC<sub>50</sub> present the hemolytic activity of peptide  
 801 concentration to kill 50% of human red blood cell. 75  $\mu\text{M}$  peptide concentration is the maximum  
 802 amount that were tested. “NDA” means “not determinable”. ‡Large pore for PG only.

803  
 804

805

**Figure 1**

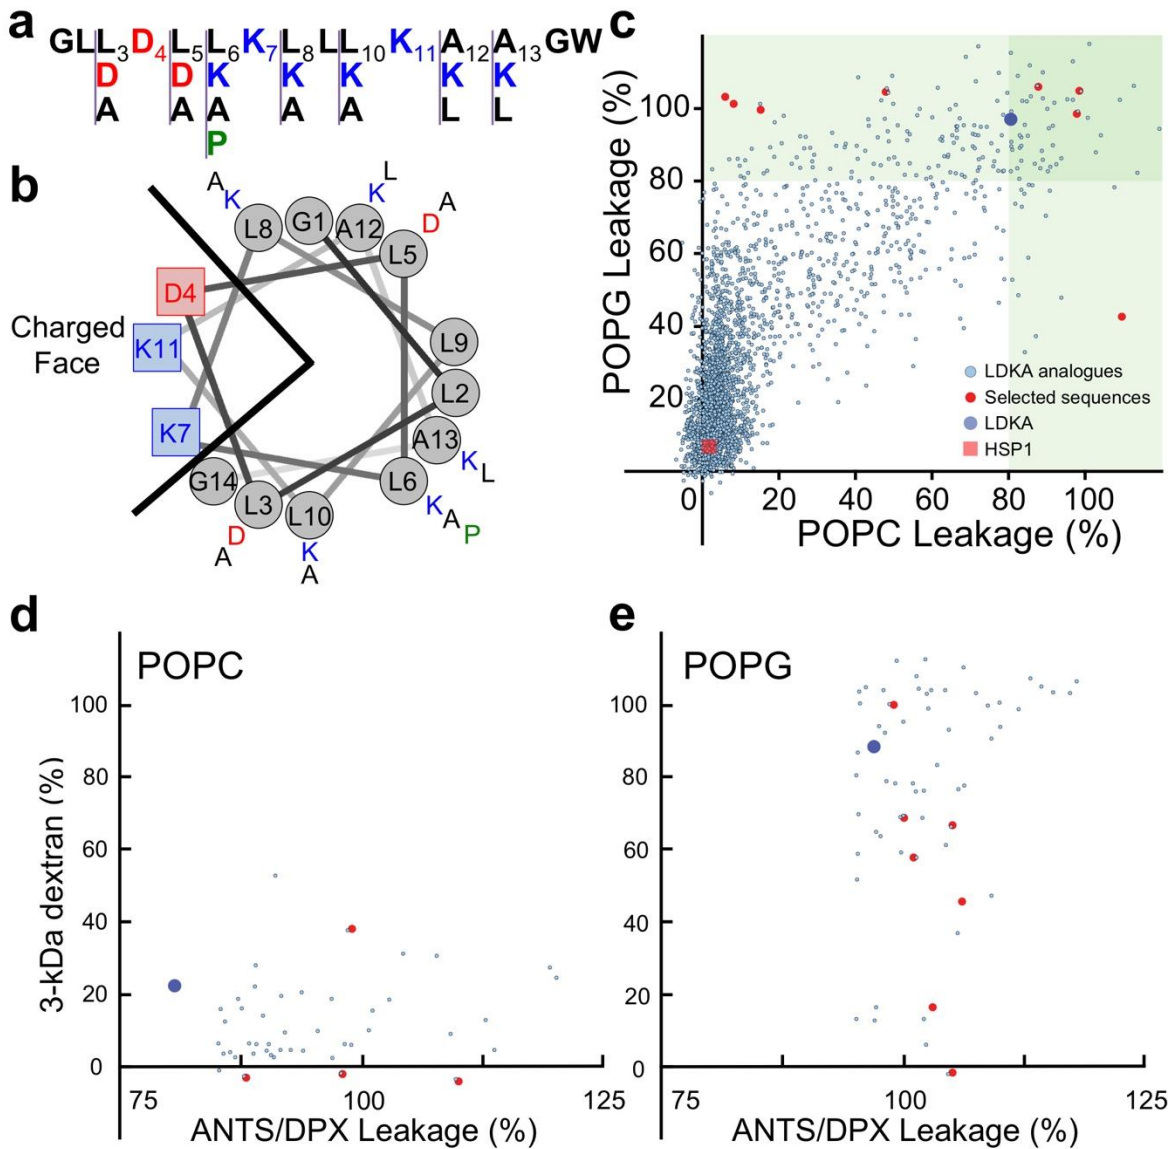

806

807

808

809

810

811

812

813

814

815

816

817

818

819

**Figure 1.** Peptide design and screening of the LDKA library contains 2,916 variants. **a**, Amino acid sequence of LDKA and its variants in the combinatorial peptide library. **b**, Helical wheel projection of LDKA showing charged and hydrophobic faces of the helix, which assumes it is a 100% helical configuration. Red and blue symbols present charged residues: negative charged and positive charged, respectively. Proline acts as a kink in the helix, and it is shown as green symbols. Other hydrophobic (leucine) and small (glycine and alanine) residues are indicated as grey symbols. **c**, High-throughput screen of LDKA peptide library induces fluorescent dye (ANTS/DPX) leakage from each POPC (x-axis) and POPG (y-axis) LUVs in 10 mM phosphate buffer at pH 7.0. Fluorescent dye release above 90% from POPC and POPG LUVs are highlighted in green areas, respectively, and the selected peptides were further analyzed their pore sizes using macromolecular fluorescent dye (3-kDa dextran). The selected LDKA library variants induce 3-kDa dextran releasing from each **d**, POPC and **e**, POPG LUVs.

820 **Figure 2**

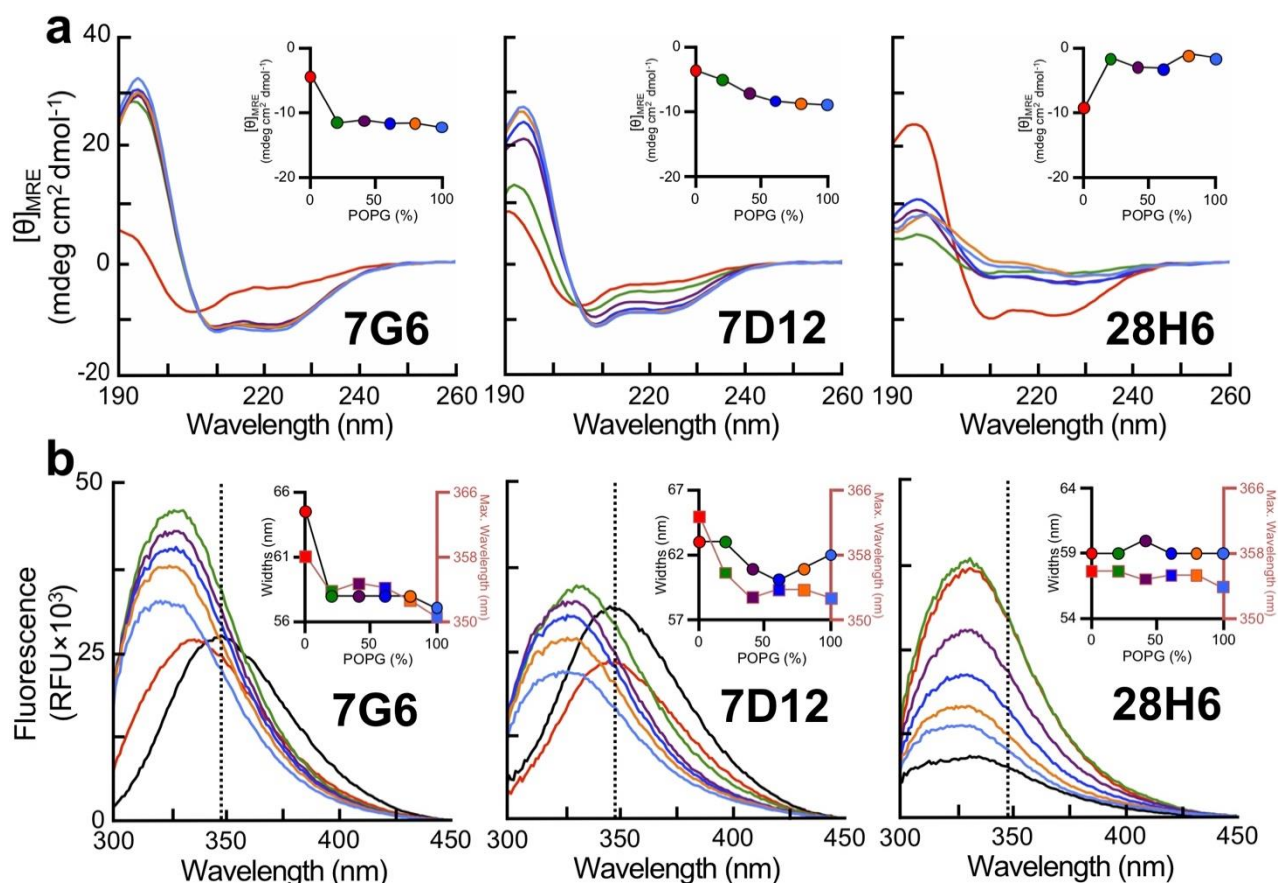

821  
 822 **Figure 2.** Peptide binding and folding of 7G6 (left), 7D12 (middle), and 28H6 (right) onto binary  
 823 mixtures of charged lipid (POPG) and neutral lipid (POPC) LUVs. **a**, Circular dichroism  
 824 spectroscopy and **b**, tryptophan fluorescent binding assay of LDKA peptides (50  $\mu$ M) at P:L = 1:12  
 825 in 600  $\mu$ M POPC/POPG LUVs with different lipid compositions: no lipid (black), 100% POPC (red),  
 826 80% POPC and 20% POPG (green), 60% POPC and 40% POPG (purple), 40% POPC and 60% POPG  
 827 (dark blue), 20% POPC and 80% POPG (orange), and 100% POPG (light blue). The experiments  
 828 were performed in 10 mM phosphate buffer at pH 7.0.

829

830 **Figure 3**

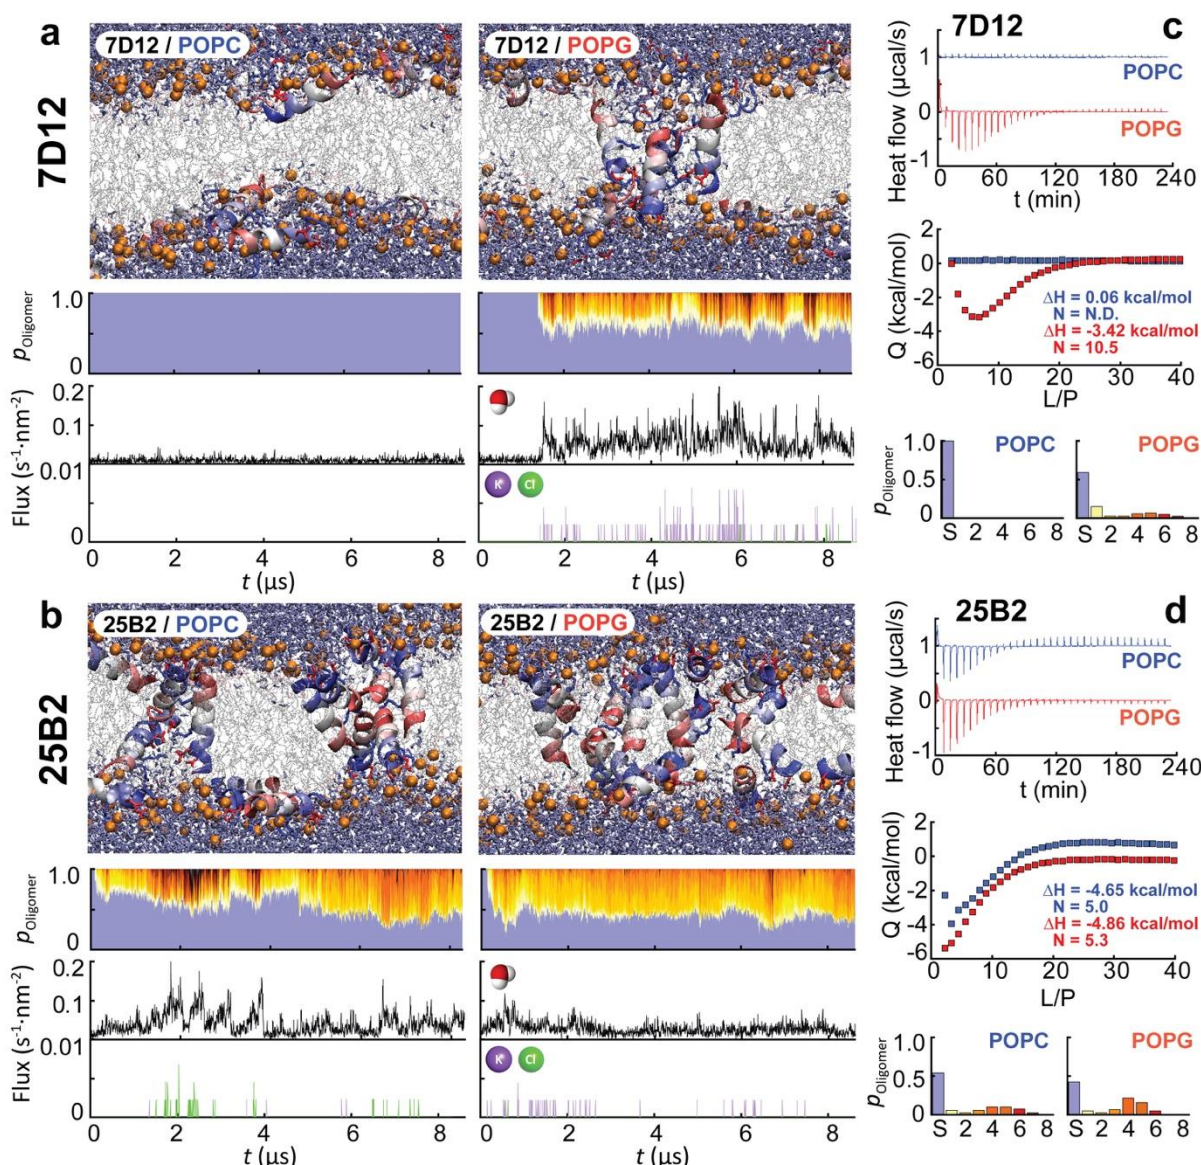

831  
 832 **Figure 3.** Multi-microsecond molecular dynamics simulations reveal the spontaneous self-  
 833 assembly of the membrane-selective peptide 7D12 and the toxic peptide 25B2 and their  
 834 oligomeric structural ensembles in POPC and POPG membranes. **a** and **b**, Representative pore  
 835 aggregates (peptides colored blue (N-) to red (C-) terminal, lipid phosphates as orange beads),  
 836 oligomeric occupation plots (blue = S-state, yellow = single TM, red-dark = higher TM oligomers,  
 837 overall distribution on right), and cross-membrane water and ion flux caused by the pore  
 838 assemblies. **c** and **d**, Isothermal titration calorimetry of the heat release/absorption of the  
 839 peptide-lipid interactions. The integrated ITC data curve of 7D12 and 25B2 with each POPC and  
 840 POPG LUVs is also shown. The concentration is fixed at 100  $\mu\text{M}$  with titrated lipid LUVs in 10 mM  
 841 phosphate buffer at pH 7.0. The ITC data is consistent with the simulation results for the binding  
 842 selectivity of 7D12 for POPG.

843



844 **Figure 4**

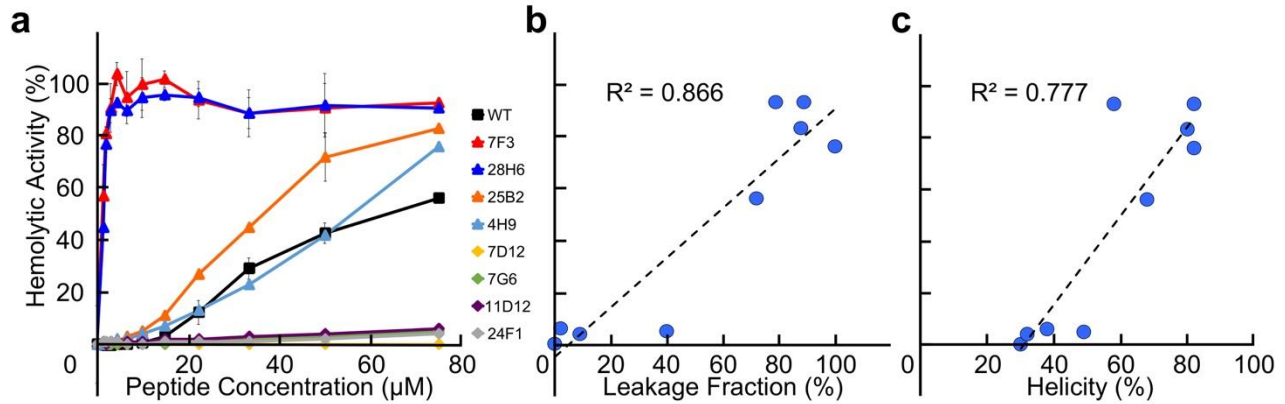

845 **Figure 4.** Selected LDKA analogues and their *in vitro* hemolytic activity with human red blood cell.  
846 **a**, Hemolytic activity with human red blood cell varies in peptide concentration. Linear regression  
847 analysis of **b**, hemolysis (at 75 µM peptide concentration) versus ANTS/DPX leakage fraction from  
848 POPC LUV (at P:L = 1:1000).  $y = 0.954x - 4.540$  and  $R^2 = 0.866$ , where  $x$  = ANTS/DPX leakage  
849 fraction (%) and  $y$  = hemolytic activity (%). **c**, Linear regression analysis of hemolytic fraction (at  
850 75 µM peptide concentration) versus peptide helicity in POPC LUV (at P:L = 1:12).  $y = 1.717x -$   
851  $52.791$ ;  $R^2 = 0.777$ , where  $x$  = helicity (%) and  $y$  = hemolytic activity (%).  
852

853

854

## Figure 5

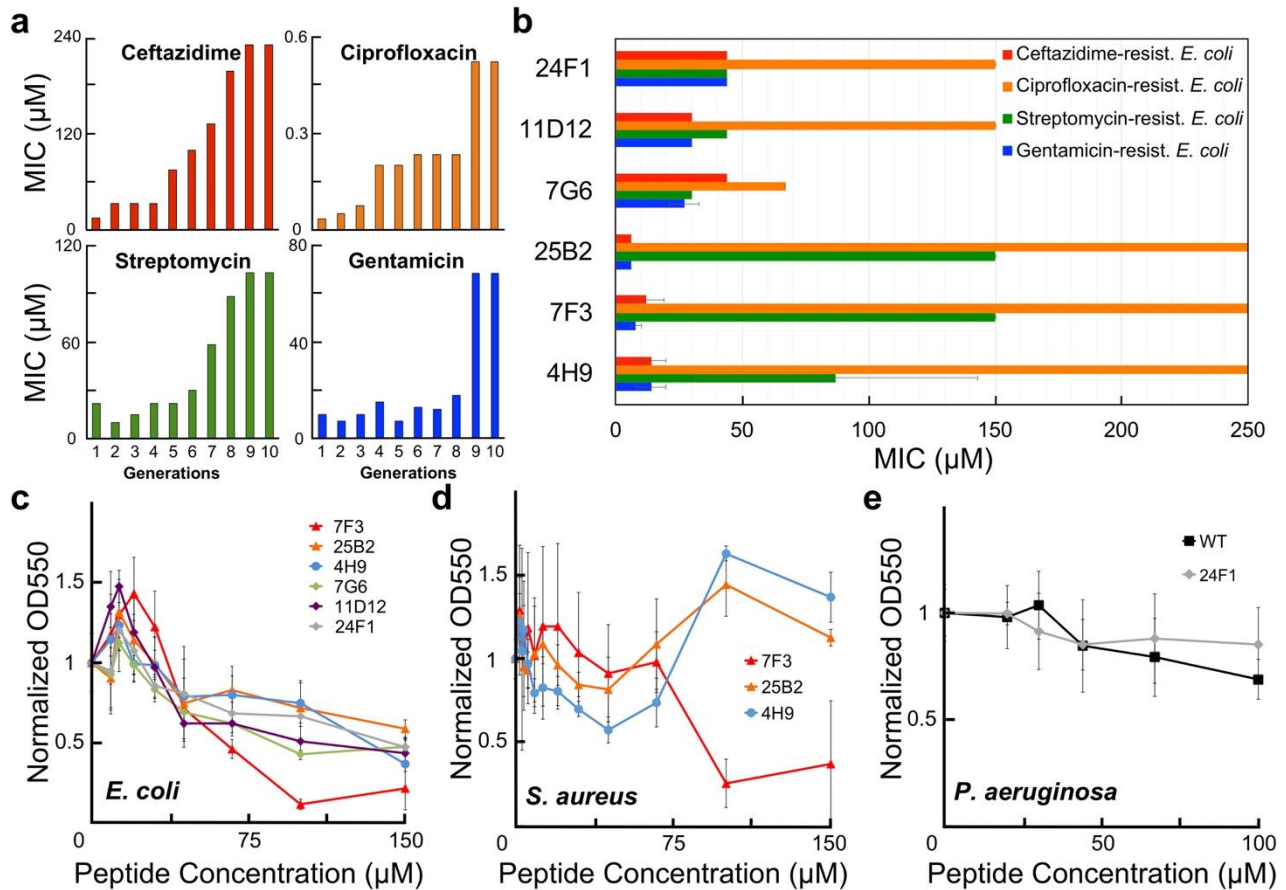

855

856

857

858

859

860

861

862

863

864

865

866

**Figure 5.** LDKA analogues against four different drug resistant *E. coli* strains and bacterial biofilms. **a**, Minimum inhibitory concentrations (MICs) of four conventional antibiotics (ceftazidime, ciprofloxacin, streptomycin, and gentamicin) were treated with serial *E. coli* generations. The *E. coli* that survives below/near the MICs was selected for the next generation. **b**, MICs of LDKA analogues (membrane-selective peptides: 24F1, 11D12 and 7G6; toxin peptides: 25B2, 7F3 and 4H9) against four different strains of drug resistant *E. coli*. Antibacterial activity of LDKA analogues against quantitative biofilm formation on polystyrene 96-well plate for 3 hr treatment. Selected analogues were tested with each **c**, *Escherichia coli* biofilm, **d**, *Staphylococcus aureus* biofilm, and **e**, *Pseudomonas aeruginosa* biofilm.
